# Supplementary material
Source: Springer Nature journal article supplement (https://www.springermedizin.de/resource/supplementary/13012_2011_407_MOESM6_ESM.pdf/9629940)
Supplement: MOESM6 [file 9629940]

Identification

Records identified through database searching (n = 14,794)

Additional records identified from previous review (n = 86) and through other sources (n = 72)

Screening

Records after duplicates removed (n = 14,188)

Records screened (n = 14,188)

Records excluded (n = 13,859)

Eligibility

Full-text articles assessed for eligibility (n = 329)

Full-text articles excluded, with reasons (n = 163)  
74 Not RCTs  
50 Did not evaluate CCDSS  
14 Supplemental reports  
9 Severe methodological flaws  
7 Did not meet CCDSS definition  
4 Did not report outcomes of interest  
4 Only abstract published  
1 Included in previous review

Included

Studies included in review series (n = 166)

Studies included in this review (met diagnostic test ordering criteria) (n = 35)
